# Supplementary material for: The species-level microbiota of healthy eyes revealed by the integration of metataxonomics with culturomics and genome analysis
Source: Front Microbiol. 2022 Sep 2;13:950591. doi: 10.3389/fmicb.2022.950591 (PMC9481467; doi:10.3389/fmicb.2022.950591)
Supplement: Supplementary Table 4 — Basic information of volunteers. [file Table_4.XLSX]

## Sheet: 志愿者对应编号及核酸ID
Serial number	Volunteer number	Eye	Gender	Age group	Age	Nationality	Education background	Career	Body temperature	Sphygmus	Respiratory rate	Systolic pressure	Diastolic pressure	Height	Weight	BMI	Vision（Right eye）	Vision（Left eye）
1	Volunteer 1	Left eye	male	20~29	24	ethnic Han	Master	Student	36.9	92	18	120	91	180	74	22.8395	0.25	0.5
2	Volunteer 2	Left eye	male	20~29	25	ethnic Han	Master	Student	36.8	87	18	122	82	184	75	22.1526	0.15+	0.2
3	Volunteer 3	Right eye	female	20~29	26	ethnic Han	Master	Student	36.2	89	19	95	80	155	52	21.6441	0.1+	0.12
4	Volunteer 4	Right eye	male	30~39	28	ethnic Han	Doctor	Teacher	36.5	59	20	103	76	170	75	25.9516	0.1+	0.12
5	Volunteer 5	Left eye	male	30~39	33	ethnic Han	Doctor	Teacher	36	94	18	112	77	174	86	28.4053	0.2-	0.15
6	Volunteer 6	Right eye	female	20~29	25	ethnic Han	Master	Student	37	77	18	100	68	162	52	19.8141	0.15	0.15+
7	Volunteer 7	Right eye	male	20~29	26	ethnic Han	Undergraduate	Service industry	36.6	67	19	132	73	183	120	35.8327	0.1	0.12
8	Volunteer 8	Right eye	female	20~29	29	ethnic Han	Doctor	Teacher	37	78	19	110	80	160	52	20.3125	0.1	0.1
9	Volunteer 9	Right eye	female	30~39	32	ethnic Han	Doctor	Student	36.2	73	18	109	80	167	57	20.4382	0.4	0.4-
10	Volunteer 10	Left eye	female	20~29	28	ethnic Han	Doctor	Student	36.2	92	18	129	81	176	61	19.6927	0.12	0.1
11	Volunteer 11	Right eye	female	20~29	26	ethnic Han	Master	Student	36.4	71	18	112	80	160	57	22.2656	0.12	0.1-
12	Volunteer 12	Left eye	female	20~29	26	ethnic Han	Master	Student	36.3	79	18	113	71	158	54	21.6311	0.25	0.3
13	Volunteer 13	Right eye	female	30~39	39	ethnic Han	Master	Medical worker	36.1	92	18	110	85	160	63	24.6094	0.3	0.25
14	Volunteer 14	Left eye	female	50~59	54	ethnic Han	Undergraduate	Teacher	36.1	91	18	95	77	160	62	24.2187	0.1-	0.1-
15	Volunteer 15	Left eye	male	60~69	61	ethnic Han	Undergraduate	Retire	36.1	69	18	132	91	168	85	30.1162	1	1
16	Volunteer 16	Right eye	female	20~29	23	ethnic Han	Undergraduate	Student	36.4	96	19	102	72	168	53	18.7783	0.25	0.2
17	Volunteer 17	Right eye	female	20~29	22	ethnic Han	Undergraduate	Service industry	36.5	81	18	121	79	159	46	18.1955	0.1	0.1-
18	Volunteer 18	Right eye	female	50~59	55	ethnic Han	Undergraduate	Civil servant	36.5	64	18	119	70	166	60	21.7738	1	1
19	Volunteer 19	Left eye	female	20~29	25	ethnic Han	Master	Student	36.7	92	18	131	60	161	55	21.2183	0.1	0.25
20	Volunteer 20	Right eye	female	60~69	71	ethnic Han	Junior high and below	Service industry	36.4	67	18	112	50	158	52	20.83	0.4-	0.6
21	Volunteer 21	Right eye	male	50~59	51	ethnic Han	Junior high and below	Service industry	36.4	69	19	117	84	162	64	24.3865	0.8-	0.6
22	Volunteer 22	Right eye	female	60~69	68	ethnic Han	Diploma	Civil servant	36.7	97	20	127	90	158	57	22.8329	0.5	0.5
23	Volunteer 23	Right eye	female	50~59	51	ethnic Han	Junior high and below	Service industry	36.4	74	18	105	68	166	65	23.5883	0.8	0.8
24	Volunteer 24	Right eye	male	30~39	36	ethnic Han	Junior high and below	Freelancer	36.4	70	18	130	84	176	90	29.0548	0.8	0.8
25	Volunteer 25	Right eye	male	20~29	28	ethnic Han	Junior high and below	Jobless	35.6	64	18	148	97	175	87	28.4082	0.3	0.3
26	Volunteer 26	Right eye	female	40~49	44	ethnic Han	Master	Teacher	36.6	74	18	126	84	160	60	23.4375	0.8	0.5
27	Volunteer 27	Left eye	male	10~19	12	ethnic Han	Junior high and below	Student	36.7	98	21	115	89	159	45	17.7999	0.6	1.2
28	Volunteer 28	Right eye	female	40~49	50	ethnic Han	Diploma	Service industry	36	75	18	134	77	167	70	25.0995	1	1
29	Volunteer 29	Right eye	male	50~59	52	ethnic Han	Junior high and below	Service industry	36.7	90	18	133	89	172	70	23.6614	0.6	0.8
30	Volunteer 30	Left eye	female	50~59	52	ethnic Han	Junior high and below	Medical worker	36.5	65	18	143	82	174	80	26.4236	0.4	0.8
31	Volunteer 31	Right eye	female	50~59	51	ethnic Han	Undergraduate	Service industry	36.6	82	19	135	88	157	66	26.7759	1	0.8+
32	Volunteer 32	Right eye	male	10~19	10	ethnic Han	Junior high and below	Student	36.1	90	22	92	68	136	33	17.8417	0.6	0.6
33	Volunteer 33	Right eye	female	50~59	51	ethnic Han	Diploma	Retire	36.4	75	18	127	87	170	53	18.3391	1	0.8
34	Volunteer 34	Right eye	female	40~49	40	ethnic Han	Diploma	Teacher	36.4	64	18	99	67	158	58	23.2335	0.8	0.8
35	Volunteer 35	Right eye	female	50~59	52	ethnic Han	Undergraduate	Service industry	36.3	65	19	127	81	168	63	22.3214	0.8	0.8
36	Volunteer 36	Right eye	male	40~49	50	ethnic Han	Junior high and below	Freelancer	36.6	56	18	154	103	168	68	24.093	0.1	0.8
37	Volunteer 37	Right eye	female	40~49	42	ethnic Han	Undergraduate	Service industry	36.5	73	18	103	65	155	46	19.1467	0.2	0.3
38	Volunteer 38	Right eye	female	20~29	24	ethnic Han	Master	Student	36.3	84	18	110	78	161	50	19.2894	0.8	1
39	Volunteer 39	Right eye	male	60~69	66	ethnic Han	Diploma	Retire	36.4	88	.	143	86	164	63	23.4236	0.6	0.6
40	Volunteer 40	Right eye	female	Under the age of 9	7	ethnic Han	Junior high and below	Student	37	72	21	91	60	124	23	14.9584	0.8	0.8
41	Volunteer 41	Right eye	female	20~29	28	ethnic Han	Diploma	Service industry	36.7	66	19	105	69	166	65	23.5883	0.15	0.25
42	Volunteer 42	Right eye	female	20~29	24	ethnic Han	Undergraduate	Service industry	36.6	80	19	114	68	161	53	20.4467	1.2	1
43	Volunteer 43	Left eye	female	40~49	49	ethnic Han	Senior middle school	Jobless	36.6	80	18	121	83	164	60	22.3081	0.5-	0.6
44	Volunteer 44	Right eye	male	50~59	58	ethnic Han	Diploma	Service industry	36.4	68	19	129	95	178	98	30.9304	1	1.0-
45	Volunteer 45	Left eye	male	20~29	27	ethnic Han	Diploma	Service industry	36.7	91	18	136	93	172	95	32.112	0.4-	0.5
46	Volunteer 46	Left eye	male	20~29	23	ethnic Han	Undergraduate	Student	36.7	63	18	111	67	172	69	23.3234	0.12	0.15
47	Volunteer 47	Right eye	female	10~19	17	ethnic Han	Senior middle school	Student	36.7	83	18	100	72	160	58	22.6562	1.2	1.2
48	Volunteer 48	Left eye	male	Under the age of 9	9	ethnic Han	Junior high and below	Student	36.5	108	20	99	73	150	47	20.8889	0.8	1
49	Volunteer 49	Left eye	male	Under the age of 9	9	ethnic Han	Junior high and below	Student	37.1	89	20	93	71	126	30	18.8964	1	1
50	Volunteer 50	Right eye	female	50~59	51	ethnic Han	Undergraduate	Service industry	36.5	76	18	115	67	166	62	22.4996	0.15	0.25
51	Volunteer 51	Left eye	female	20~29	29	ethnic Han	Master	Student	36.6	77	18	100	75	166	52	18.8707	0.2	0.15
52	Volunteer 52	Left eye	male	20~29	28	ethnic Han	Undergraduate	Civil servant	36.8	56	18	120	76	178	60	18.937	0.1-	0.1-
53	Volunteer 53	Left eye	female	50~59	52	ethnic Han	Undergraduate	Medical worker	36.7	80	18	100	67	156	52	21.3675	0.1-	0.1-
54	Volunteer 54	Right eye	male	20~29	29	ethnic Han	Undergraduate	Service industry	36.3	75	18	129	76	177	85	27.1314	1.0-	0.8-
55	Volunteer 55	Right eye	male	30~39	35	ethnic Han	Undergraduate	Medical worker	36.4	67	20	135	89	175	68	22.2041	0.1	0.1-
56	Volunteer 56	Right eye	female	50~59	59	ethnic Han	Junior high and below	Jobless	36	68	18	112	71	164	55	20.4491	0.1-	0.1-
57	Volunteer 57	Right eye	male	50~59	56	ethnic Han	Undergraduate	Service industry	36.3	59	18	126	83	174	78	25.763	0.12	0.1-
58	Volunteer 58	Left eye	male	20~29	28	ethnic Han	Undergraduate	Service industry	36.5	70	18	133	78	171	66	22.571	0.1	0.12
59	Volunteer 59	Left eye	male	50~59	53	ethnic Han	Undergraduate	Teacher	36.3	90	.	119	82	170	89	30.7958	0.12	0.1
60	Volunteer 60	Left eye	male	20~29	23	ethnic Han	Diploma	Student	36.6	84	18	138	86	178	66	20.8307	0.4	0.8
61	Volunteer 61	Left eye	male	40~49	50	ethnic Han	Diploma	Service industry	36.6	85	19	119	83	178	65	20.5151	0.4	0.5
62	Volunteer 62	Left eye	female	40~49	41	ethnic Han	Junior high and below	Jobless	36.6	86	18	128	98	168	80	28.3447	1	1
63	Volunteer 63	Left eye	female	60~69	62	ethnic Han	Senior middle school	Retire	36.3	75	18	140	73	163	60	22.5827	0.5	0.6
64	Volunteer 64	Right eye	female	20~29	24	ethnic Han	Master	Student	36.8	87	18	108	73	174	62	20.4783	0.12	0.12
65	Volunteer 65	Right eye	female	70~79	75	ethnic Han	Undergraduate	Retire	36.7	76	18	133	71	150	49	21.7778	0.3	0.5
66	Volunteer 66	Left eye	female	40~49	46	ethnic Han	Undergraduate	Medical worker	36.4	82	18	137	91	160	61	23.8281	1	0.4
67	Volunteer 67	Right eye	female	70~79	71	ethnic Han	Junior high and below	Retire	36.5	71	18	130	77	155	61	25.3902	0.8	1.0-
68	Volunteer 68	Left eye	female	30~39	39	ethnic Han	Junior high and below	Service industry	36.5	70	18	131	88	155	64	26.6389	0.5	0.5
69	Volunteer 69	Right eye	male	10~19	10	ethnic Han	Junior high and below	Student	36.4	85	20	110	72	158	50	20.0288	0.4	0.4
70	Volunteer 70	Right eye	female	70~79	72	ethnic Han	Junior high and below	Service industry	36.3	77	18	131	77	165	69	25.3444	0.3	0.8
71	Volunteer 71	Left eye	female	Over 80 years old	80	ethnic Han	Undergraduate	Retire	36	59	16	139	59	160	60	23.4375	0.8	0.6-
72	Volunteer 72	Right eye	female	50~59	54	ethnic Han	Diploma	Retire	36.4	65	18	120	71	157	60	24.3418	0.2	0.2
73	Volunteer 73	Right eye	male	Over 80 years old	82	ethnic Han	Undergraduate	Retire	36.6	78	18	152	74	170	74	25.6055	0.25	0.2
74	Volunteer 74	Right eye	male	50~59	57	ethnic Han	Diploma	Civil servant	36.2	93	18	125	84	177	82	26.1738	0.5	0.5
75	Volunteer 75	Left eye	female	50~59	55	ethnic Han	Undergraduate	Teacher	36.4	84	18	125	80	170	64	22.1453	0.8	0.8
76	Volunteer 76	Right eye	male	20~29	29	ethnic Han	Doctor	Student	36.6	88	16	135	83	179	75	23.4075	0.1ˉ	0.1
77	Volunteer 77	Right eye	female	40~49	47	ethnic Han	Undergraduate	Freelancer	36.4	82	18	113	71	161	57	21.9899	1	1.0-
78	Volunteer 78	Left eye	male	50~59	58	ethnic Han	Diploma	Service industry	36.3	90	18	120	83	180	68	20.9877	1	0.6＋
79	Volunteer 79	Right eye	female	70~79	65	ethnic Han	Junior high and below	Retire	36.4	69	18	92	64	159	62	24.5243	1	0.6ˉ
80	Volunteer 80	Left eye	female	20~29	21	ethnic Han	Undergraduate	Student	36.4	92	18	121	86	163	50	18.8189	0.25	0.2
81	Volunteer 81	Right eye	female	70~79	75	ethnic Han	Junior high and below	Retire	36.3	82	18	135	82	156	54	22.1893	0.6	0.6
82	Volunteer 82	Right eye	female	60~69	69	ethnic Han	Undergraduate	Civil servant	36.4	78	18	131	96	164	63	23.4236	0.8	0.8
83	Volunteer 83	Left eye	female	60~69	68	ethnic Han	Diploma	Medical worker	36.3	71	18	129	71	150	45	20	0.8-	0.6
84	Volunteer 84	Left eye	female	20~29	24	ethnic Han	Undergraduate	Medical worker	36.7	100	19	128	99	176	55	17.7557	0.1	0.1
85	Volunteer 85	Left eye	female	30~39	36	ethnic Han	Undergraduate	Service industry	36	89	18	111	82	167	65	23.3067	1.0-	1
86	Volunteer 86	Left eye	female	30~39	32	ethnic Han	Master	Medical worker	36.7	85	19	117	87	170	65	22.4913	1	0.8
87	Volunteer 87	Left eye	male	30~39	30	ethnic Han	Master	Medical worker	36.4	93	20	125	82	182	77	23.246	0.05	0.06
88	Volunteer 88	Left eye	female	Under the age of 9	8	ethnic Han	Junior high and below	Student	36.7	72	19	87	55	127	20	12.4	1	1
89	Volunteer 89	Left eye	female	60~69	69	ethnic Han	Junior high and below	Jobless	36.4	62	18	155	87	151	53	23.2446	0.5	0.5
90	Volunteer 90	Right eye	female	Over 80 years old	80	ethnic Han	Junior high and below	Medical worker	36.4	71	18	136	70	151	57	24.9989	0.6	0.6
91	Volunteer 91	Right eye	female	30~39	29	ethnic Han	Undergraduate	Service industry	36.4	79	18	108	81	151	57	24.9989	0.1-	0.1-
92	Volunteer 92	Left eye	female	20~29	24	ethnic Han	Master	Student	36.6	80	18	98	61	168	49	17.3611	0.2	0.2
93	Volunteer 93	Right eye	female	60~69	65	ethnic Han	Junior high and below	Service industry	36.3	86	19	118	81	157	62	25.1532	1	1
94	Volunteer 94	Right eye	female	30~39	36	ethnic Han	Undergraduate	Service industry	36.5	64	18	96	67	163	50	18.8189	0.1-	0.1-
95	Volunteer 95	Right eye	male	30~39	36	ethnic Han	Undergraduate	Civil servant	36.3	82	18	92	69	174	88	29.0659	0.15	0.12
96	Volunteer 96	Right eye	male	60~69	60	ethnic Han	Diploma	Service industry	36.2	67	18	108	71	168	75	26.5731	0.6	0.8
97	Volunteer 97	Left eye	female	50~59	54	ethnic Han	Undergraduate	Service industry	36.5	71	18	99	69	153	51	21.7865	0.6	0.6-
98	Volunteer 98	Right eye	male	30~39	35	ethnic Han	Undergraduate	Civil servant	36.4	90	18	133	92	173	86	28.7347	0.05	0.05
99	Volunteer 99	Right eye	male	10~19	17	ethnic Han	Senior middle school	Student	36.6	73	18	118	81	185	71	20.7451	0.25	0.25
100	Volunteer 100	Right eye	male	Under the age of 9	7	ethnic Han	Junior high and below	Student	36.7	99	20	81	53	125	22	14.08	0.4	0.4
101	Volunteer 101	Left eye	male	Under the age of 9	9	ethnic Han	Junior high and below	Student	36.5	70	20	98	67	133	40	22.6129	1.0-	1.0-
102	Volunteer 102	Right eye	female	Under the age of 9	6	ethnic Han	Junior high and below	Student	36.6	93	20	89	65	105	17	15.4195	0.5	0.5
103	Volunteer 103	Left eye	male	30~39	33	ethnic Han	Undergraduate	Service industry	36.5	68	18	116	81	173	70	23.3887	0.5	0.6
104	Volunteer 104	Right eye	female	60~69	67	ethnic Han	Junior high and below	Retire	36.4	63	19	132	80	153	57	24.3496	0.6	0.8-
105	Volunteer 105	Right eye	male	30~39	38	ethnic Han	Master	Service industry	36.5	68	19	134	101	168	75	26.5731	0.1	0.1
106	Volunteer 106	Left eye	male	30~39	32	ethnic Han	Master	Teacher	36.7	94	18	126	89	170	72	24.9135	1	0.8-
107	Volunteer 107	Left eye	male	50~59	50	ethnic Han	Master	Medical worker	36.6	92	19	148	100	178	95	29.9836	0.2	0.2
108	Volunteer 108	Right eye	male	50~59	56	ethnic Han	Junior high and below	Civil servant	36.7	92	18	156	96	160	60	23.4375	1	1
109	Volunteer 109	Right eye	female	30~39	36	ethnic Han	Undergraduate	Service industry	36.5	76	17	111	68	158	59	23.634	0 .4	0.4
110	Volunteer 110	Left eye	male	Under the age of 9	6	ethnic Han	Junior high and below	Student	36.4	86	20	88	45	126	25	15.747	0.6	0.6
111	Volunteer 111	Right eye	female	30~39	35	ethnic Han	Undergraduate	Service industry	36.4	64	19	114	77	162	54	20.5761	0.8	1
112	Volunteer 112	Left eye	female	40~49	40	ethnic Han	Undergraduate	Service industry	36.6	83	18	126	90	159	64	25.3155	1	1
113	Volunteer 113	Right eye	female	60~69	66	ethnic Han	Undergraduate	Teacher	36.4	70	18	160	85	165	80	29.3848	0.8	1
114	Volunteer 114	Left eye	female	60~69	62	ethnic Han	Undergraduate	Civil servant	36.3	78	18	105	75	170	75	25.9516	0.1	0.1
115	Volunteer 115	Right eye	male	60~69	69	ethnic Han	Junior high and below	Service industry	36.6	64	18	98	70	177	68	21.7051	0.1	0.1
116	Volunteer 116	Right eye	male	50~59	60	ethnic Han	Senior middle school	Civil servant	36.2	88	18	121	85	170	75	25.9516	0.5	0.6
117	Volunteer 117	Right eye	male	50~59	50	ethnic Han	Senior middle school	Service industry	36.3	92	18	128	85	174	70	23.1206	0.4	0.6
118	Volunteer 118	Right eye	female	40~49	48	ethnic Han	Undergraduate	Civil servant	36.3	67	18	107	68	162	60	22.8624	1	1
119	Volunteer 119	Right eye	male	40~49	45	ethnic Han	Undergraduate	Civil servant	36.3	71	18	122	83	181	80	24.4193	0.2	0.3
120	Volunteer 120	Right eye	male	20~29	24	ethnic Han	Undergraduate	Student	36.6	74	18	119	86	165	58	21.3039	0.5	0.6+
121	Volunteer 121	Right eye	female	20~29	24	ethnic Han	Master	Student	36.7	80	18	123	86	168	52	18.424	0.3	0.25
122	Volunteer 122	Right eye	female	20~29	24	ethnic Han	Master	Student	36.4	96	18	119	81	172	62	20.9573	0.12	0.1
123	Volunteer 123	Right eye	female	20~29	25	ethnic Han	Master	Student	36.7	72	18	138	84	164	58	21.5645	0.12	0.12
124	Volunteer 124	Right eye	male	20~29	23	ethnic Han	Undergraduate	Student	36.4	87	18	118	83	176	88	28.4091	0.2-	0.2-
125	Volunteer 125	Right eye	female	60~69	65	ethnic Han	Junior high and below	Jobless	36.5	60	18	144	72	154	70	29.5159	0.6	0.5
126	Volunteer 126	Right eye	female	50~59	54	ethnic Han	Undergraduate	Teacher	36.6	80	18	114	61	161	67	25.8478	0.15	0.6
127	Volunteer 127	Left eye	female	Under the age of 9	8	ethnic Han	Junior high and below	Student	36.6	87	20	105	65	138	29	15.2279	1	1
128	Volunteer 128	Left eye	female	10~19	13	Manchu	Junior high and below	Student	36.4	81	19	100	73	164	65	24.1672	0.8	0.5
